# Supplementary material for: Clinical, Pathologic, and Genetic Features of Collagen VI-Related Myopathy in Korea
Source: PubMed Central journal article supplement — J Clin Neurol. 2017 Aug 1;13(4):331–9. doi: 10.3988/jcn.2017.13.4.331 (PMC5653620; doi:10.3988/jcn.2017.13.4.331), 2017-08-01
Supplement: jcn-13-331-s001.pdf [file jcn-13-331-s001.pdf]

**Supplementary Table 1.** List of 69 myopathy-related genes

| <b>Gene symbol</b> | <b>OMIM number</b> | <b>Transcript ID</b> |
|--------------------|--------------------|----------------------|
| <i>ACTA1</i>       | 102610             | NM_001100            |
| <i>ANO5</i>        | 608662             | NM_213599            |
| <i>BAG3</i>        | 603883             | NM_004281            |
| <i>BIN1</i>        | 601248             | NM_139343            |
| <i>CAPN3</i>       | 114240             | NM_000070            |
| <i>CAV3</i>        | 601253             | NM_033337            |
| <i>CFL2</i>        | 601443             | NM_021914            |
| <i>CHKB</i>        | 612395             | NM_005198            |
| <i>COL6A1</i>      | 120220             | NM_001848            |
| <i>COL6A2</i>      | 120240             | NM_001848            |
| <i>COL6A3</i>      | 120250             | NM_004369            |
| <i>CPT2</i>        | 600650             | NM_000098            |
| <i>CRYAB</i>       | 123590             | NM_001885            |
| <i>DAG1</i>        | 128239             | NM_001165928         |
| <i>DES</i>         | 125660             | NM_001927            |
| <i>DMD</i>         | 300377             | NM_004006            |
| <i>DNAJB6</i>      | 611332             | NM_058246            |
| <i>DNM2</i>        | 602378             | NM_001005360         |
| <i>DPM2</i>        | 603564             | NM_003863            |
| <i>DPM3</i>        | 605951             | NM_153741            |
| <i>DYSF</i>        | 603009             | NM_003494            |
| <i>EMD</i>         | 300384             | NM_000117            |
| <i>ENO3</i>        | 131370             | NM_053013            |
| <i>FHL1</i>        | 300163             | NM_001159699         |
| <i>FKRP</i>        | 606596             | NM_024301            |
| <i>FKTN</i>        | 607440             | NM_001079802         |
| <i>FLNC</i>        | 102565             | NM_001458            |
| <i>GAA</i>         | 606800             | NM_001079803         |
| <i>GNE</i>         | 603824             | NM_001128227         |
| <i>GTDC2</i>       | 614828             | NM_032806            |
| <i>ISPD</i>        | 614631             | NM_001101426         |
| <i>ITGA7</i>       | 600536             | NM_002206            |
| <i>KBTBD13</i>     | 613727             | NM_001101362         |
| <i>KLHL9</i>       | 611201             | NM_018847            |
| <i>KLHL40</i>      | 615340             | NM_152393            |
| <i>LAMA2</i>       | 156225             | NM_000426            |
| <i>LARGE</i>       | 603590             | NM_004737            |
| <i>LDB3</i>        | 605906             | NM_007078            |
| <i>LDHA</i>        | 150000             | NM_005566            |
| <i>LMNA</i>        | 150330             | NM_170707            |
| <i>MEGF10</i>      | 612453             | NM_032446            |
| <i>MTM1</i>        | 300415             | NM_000252            |
| <i>MYH2</i>        | 170740             | NM_017534            |
| <i>MYH7</i>        | 160760             | NM_000257            |
| <i>MYOT</i>        | 604103             | NM_006790            |
| <i>NEB</i>         | 161650             | NM_001271208         |
| <i>PFKM</i>        | 610681             | NM_001166686         |
| <i>PGAM2</i>       | 612931             | NM_000290            |
| <i>PLEC</i>        | 601282             | NM_000445            |
| <i>POMGNT1</i>     | 606822             | NM_001243766         |
| <i>POMT1</i>       | 607423             | NM_007171            |
| <i>POMT2</i>       | 607439             | NM_013382            |
| <i>PTRF</i>        | 603198             | NM_012232            |
| <i>PYGM</i>        | 608455             | NM_005609            |
| <i>RYR1</i>        | 180901             | NM_000540            |
| <i>SEPN1</i>       | 606210             | NM_020451            |
| <i>SGCA</i>        | 600119             | NM_000023            |
| <i>SGCB</i>        | 600900             | NM_000232            |
| <i>SGCD</i>        | 601411             | NM_000337            |
| <i>SGCG</i>        | 608896             | NM_000231            |
| <i>TCAP</i>        | 604488             | NM_003673            |
| <i>TMEM43</i>      | 612048             | NM_024334            |
| <i>TNNT1</i>       | 191041             | NM_003283            |
| <i>TNPO3</i>       | 610032             | NM_012470            |
| <i>TPM2</i>        | 190990             | NM_003289            |
| <i>TPM3</i>        | 191030             | NM_152263            |
| <i>TRIM32</i>      | 602290             | NM_012210            |
| <i>TTN</i>         | 188840             | NM_001267550         |
| <i>VCP</i>         | 601023             | NM_007126            |
