# Supplementary material for: Clinical, Pathologic, and Genetic Features of Collagen VI-Related Myopathy in Korea
Source: PubMed Central journal article supplement — J Clin Neurol. 2017 Aug 1;13(4):331–9. doi: 10.3988/jcn.2017.13.4.331 (PMC5653620; doi:10.3988/jcn.2017.13.4.331), 2017-08-01
Supplement: jcn-13-331-s002.pdf [file jcn-13-331-s002.pdf]

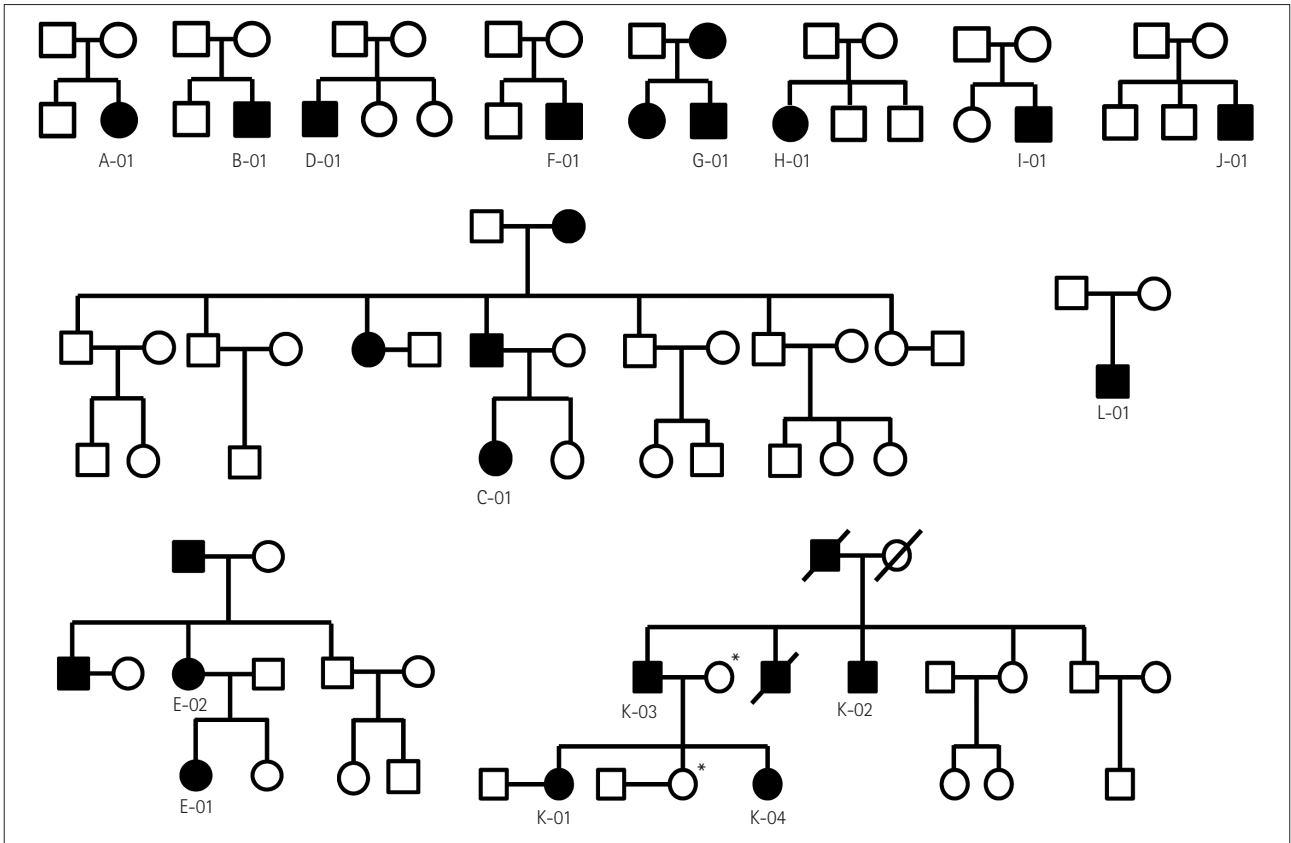

**Supplementary Fig. 1.** Pedigree of each patient and family (A to L). Filled circles or rectangles represent patients. We performed a segregation study in K family and normal family members; those was marked with \* do not have c.956A>G variant in *COL6A1* gene.
