# Supplementary figures and images for: Clinical, Pathologic, and Genetic Features of Collagen VI-Related Myopathy in Korea
Source: PubMed Central journal article supplement — J Clin Neurol. 2017 Aug 1;13(4):331–9. doi: 10.3988/jcn.2017.13.4.331 (PMC5653620; doi:10.3988/jcn.2017.13.4.331), 2017-08-01

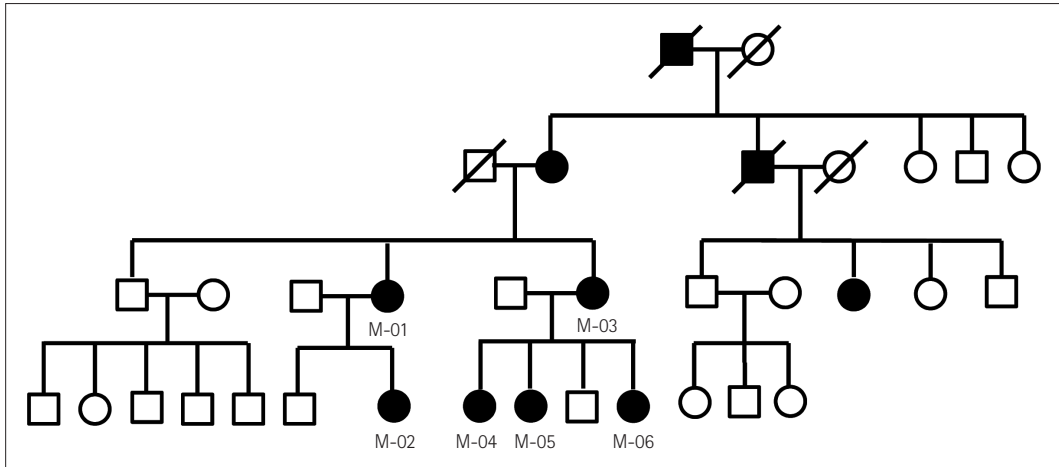

**Supplementary Fig. 2.** The pedigree of M family. Filled circles or rectangles represent patients.

Supplement: jcn-13-331-s003.pdf [file jcn-13-331-s003.pdf]
